# Supplementary material for: A Comparison of Psychophysical Dose-Response Behaviour across 16 Sweeteners
Source: PubMed Central journal article supplement (PMC6266678; doi:10.3390/nu10111632), 2018-11-02
Supplement: nutrients-10-01632-s001.pdf [file nutrients-10-01632-s001.pdf]

## Supplementary Materials

**Table S1.** Concentrations tested for each of the sweetener sets in molarity (mmol/L)

| Sweetener          | Molecular Weight (g/mol) | Concentration (% w/v) |       |       |       |       |        |        |
|--------------------|--------------------------|-----------------------|-------|-------|-------|-------|--------|--------|
|                    |                          | 1                     | 2     | 3, 4  | 5     | 6     | 7      | 8      |
| Acesulfame-K       | 201.2                    | 0                     | 0.50  | 1.09  | 2.38  | 5.22  | 11.38  | 24.85  |
| Allulose           | 180.2                    | 0                     | 210.9 | 305.3 | 444.0 | 649.4 | 949.2  | 1387.7 |
| Aspartame          | 294.3                    | 0                     | 0.34  | 0.67  | 1.33  | 2.62  | 5.16   | 10.19  |
| Dextrose           | 198.2                    | 0                     | 191.8 | 277.5 | 403.7 | 590.4 | 862.9  | 1261.5 |
| Erythritol         | 122.1                    | 0                     | 311.2 | 450.5 | 655.2 | 958.2 | 1400.5 | 2047.5 |
| Fructose           | 180.2                    | 0                     | 210.9 | 305.3 | 444.0 | 649.4 | 949.2  | 1387.7 |
| <i>Luo han guo</i> | 1287.4                   | 0                     | 0.08  | 0.15  | 0.30  | 0.60  | 1.18   | 2.33   |
| Maltitol           | 344.3                    | 0                     | 110.4 | 159.7 | 232.4 | 339.8 | 496.7  | 726.1  |
| Mannitol           | 182.2                    | 0                     | 208.6 | 301.9 | 439.1 | 642.2 | 938.5  | 1372.1 |
| Mixture *          | –                        | 0                     | 145.5 | 210.6 | 306.3 | 448.0 | 654.7  | 957.2  |
| Palatinose         | 342.2                    | 0                     | 111.0 | 184.0 | 309.7 | 517.1 | 870.6  | 1460.7 |
| Sorbitol           | 182.2                    | 0                     | 208.6 | 301.9 | 439.1 | 642.2 | 938.5  | 1372.1 |
| Stevia             | 967.0                    | 0                     | 0.04  | 0.09  | 0.18  | 0.36  | 0.75   | 1.55   |
| Sucralose          | 397.6                    | 0                     | 0.25  | 0.51  | 1.04  | 2.12  | 4.33   | 8.80   |
| Sucrose            | 342.2                    | 0                     | 111.0 | 160.7 | 233.8 | 341.9 | 499.7  | 730.6  |
| Xylitol            | 152.2                    | 0                     | 249.7 | 361.4 | 525.6 | 768.7 | 1123.5 | 1642.6 |

\* Molarity is calculated based on the average molarity of sucrose and allulose in a 1:1 mixture (weight basis)

**Table S2.** Fitting parameters for dose-response of sweeteners using the Hill equation.

| Sweetener          | Min. Sweetness     | Max. Sweetness   | LOGEC <sub>50</sub> | Hill Slope |
|--------------------|--------------------|------------------|---------------------|------------|
|                    | R <sub>min</sub> * | R <sub>max</sub> |                     |            |
| Acesulfame-K       | 0                  | 24.2             | 0.050               | 10.46      |
| Allulose           | 0                  | 28.3             | 12.51               | 0.098      |
| Aspartame          | 0                  | 29.7             | 0.066               | 8.90       |
| Dextrose           | 0                  | 35.8             | 15.90               | 0.057      |
| Erythritol         | 0                  | 33.1             | 14.14               | 0.093      |
| Fructose           | 0                  | 41.7             | -55.78              | 0.039      |
| <i>Luo han guo</i> | 0                  | 30.8             | -0.42               | 4.08       |
| Maltitol           | 0                  | 35.0             | 11.57               | 0.080      |
| Mannitol           | 0                  | 29.9             | 15.14               | 0.13       |
| Mixture †          | 0                  | 33.0             | 11.74               | 0.12       |
| Palatinose         | 0                  | 32.6             | 28.95               | 0.056      |
| Sucralose          | 0                  | 35.9             | -0.34               | 5.59       |
| Sorbitol           | 0                  | 33.8             | 15.43               | 0.10       |
| Stevia             | 0                  | 23.7             | 0.025               | 23.78      |
| Sucrose            | 0                  | 37.6             | 3.60                | 0.050      |
| Xylitol            | 0                  | 34.5             | 10.46               | 0.11       |

† 1:1 sucrose–allulose mixture (weight basis); \* The parameter ‘Rmin’ was constrained to zero prior to fitting
